# Supplementary material
Source: Royal Society of Chemistry journal article supplement (doi:10.1039/d6re00084c)
Supplement: d6re00084c1.pdf [file d6re00084c1.pdf]

## Support Information

### Effects of Different Compatibilizers on Interfacial Compatibility, Crystallization, and Mechanics of PBAT/PLA Blends

Yongchao Li<sup>1,2</sup>, Shirui Sun<sup>3</sup>, Dan Liu<sup>4</sup>, Long Zhou<sup>4</sup>, Liwu Zhang<sup>4</sup>, Qi Zhang<sup>1,5\*</sup>, Yuanxia Wang<sup>2</sup>, Ying Shi<sup>2</sup>, Li-Zhi LIU<sup>2</sup>, Lixin Song<sup>2\*</sup>

1. College of Materials Science and Engineering, Shenyang University of Technology, Shenyang 110870, China;
2. School of Materials Science and Engineering, Shenyang University of Chemical Technology, Shenyang 110142, China;
3. The Fourth Affiliated Hospital, China Medical University, Shenyang 110032, China;
4. Changchun Shunfeng New Materials Co., Ltd, Changchun 130051, China;
5. School of Science, Shenyang University of Technology, Shenyang 110870, China.

\*Correspondence: [zhangqi@sut.edu.cn](mailto:zhangqi@sut.edu.cn); [lxsong@syuct.edu.cn](mailto:lxsong@syuct.edu.cn)

Table S1. Gel content of P/P blends with different compatibilizers

| Sample designation | Gel content (%) |
|--------------------|-----------------|
| P/P                | 0.00            |
| P/P/G              | 1.65            |
| P/P/H              | 1.15            |
| P/P/E              | 2.15            |
| P/P/C              | 0.00            |

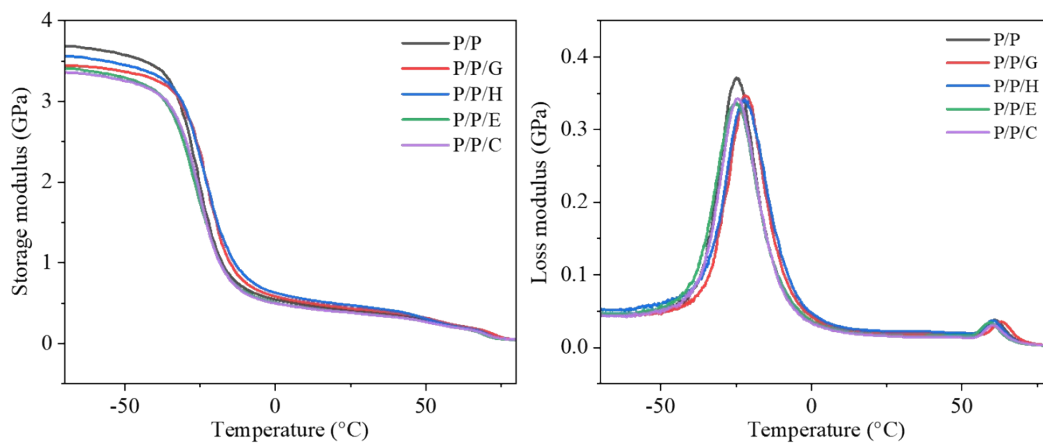

Figure S1. Storage modulus and loss modulus in DMA testing

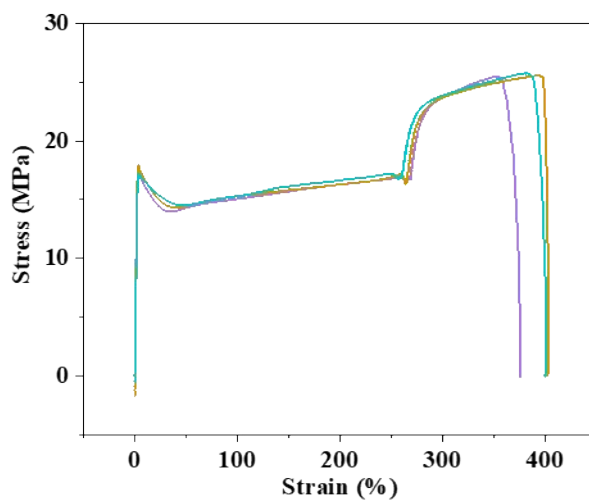

Figure S2. Stress-strain curves of P/P/C blend
